# Supplementary material for: Enhanced upward motion through the troposphere over the tropical western Pacific and its implication to transport of trace gases from the troposphere to the stratosphere
Source: Copernicus journal article supplement (doi:10.5194/acp-2021-647), 2021-09-02
Supplement: Supplementary file [file acp-2021-647-AC1-supplement.pdf]

1 **Responses to the comments by Referee #1**

2

3

4

5 **Manuscript number:** acp-2021-647

6

7

8

9 **Title: Enhanced upward motion through the troposphere over the tropical**  
10 **western Pacific and its implications for the transport of trace gases from the**  
11 **troposphere to the stratosphere**

12

13

14

15

16 **Author(s):** Kai Qie, Wuke Wang, Wenshou Tian\*, Rui Huang, Mian Xu, Tao Wang,

17

Yifeng Peng

18

19

20

21

**December 2021**

22

23 This is an interesting and useful study. However the scientific content, the quality of  
24 the study and its presentation should be improved. In particular, the text is in some  
25 parts very descriptive and technical. I suggest some major revisions before publication  
26 by ACP.

27 **Re: Thank you very much for your helpful suggestions which help us improve**  
28 **our manuscript substantially. We have modified our manuscript according to the**  
29 **comments. Our point-to-point responses to the reviewer' s comments are below:**

30

31 **General comments:**

32 1) In general in the manuscript it is very often written 'we found a positive or negative  
33 trend'. Please specify here your message by adding some numbers in the text (a trend  
34 of xxx per year or a change of xxx within 60 years from 1958 to 2017). It would be  
35 also very helpful to give the reader an impression whether these trends are of minor or  
36 major importance by adding some numbers from the literature for comparison. In  
37 general, I am wondering that the results are not discussed more quantitatively (see  
38 specific comments below). Further, please explain in detail how the trends  
39 are calculated and how the El Niño Southern Oscillation (ENSO) is considered in  
40 calculating the trends.

41 **Re: We thank the reviewer for the constructive comments. The quantitative**  
42 **results are added to the revised manuscript according to the referee's specific**  
43 **comments below. The methods of how the trends are calculated and how the**  
44 **impact of ENSO is evaluated are also described in the revised manuscript. The**  
45 **details are shown in the responses to the referee's specific comments below.**

46

47 2) Figures: In general, the font size of the labels is very small and should be enlarged.  
48 Further, the text in the figure captions is very similar to each other. Please give here  
49 the reader more information which data or model simulations are shown and add  
50 some explanation what is important or what is the main message of the figure.

51 **Re: Thanks for the suggestion. The font sizes of the labels in each figure are**  
52 **enlarged, and the figure captions are rephrased.**

53

54 3) In Section 2 the used data sets and model simulations are described. However, I am  
55 missing a bit more motivation for the reader to understand why these data sets and  
56 model simulations are used. A bit more explanation would be helpful.

57 **Re: Thanks for the comment. We have added some text to explain why the**  
58 **datasets and model simulations are used in this study, and the descriptions about**  
59 **the reanalysis datasets and model simulations are rephrased according to the**  
60 **referee's specific comments.**

61

62 3) The use of observations such as CO satellite measurements would strengthen the  
63 main message of the manuscript. Therefore, I recommend to add some satellite data  
64 (e.g. MLS CO <https://mls.jpl.nasa.gov/eos-aura-mls/data-products/co>)

65 **Re: We thank the reviewer's good suggestion. An extra figure showing the trends**  
66 **of CO observed by MOPITT and MLS at near 200 hPa during 2000-2017 and**  
67 **2005-2017 is added in the revised manuscript. The CO shows significantly**  
68 **increasing trends over the TWP in NDJFM using MOPITT (at 200 hPa during**  
69 **2000-2017) and MLS data (at 215 hPa during 2005-2017). The MLS CO data**  
70 **show that the area-averaged CO increased approximately  $2.0\pm 3.7$  ppbv decade<sup>-1</sup>**  
71 **over the TWP, while the CO increased  $5.0\pm 3.1$  ppbv decade<sup>-1</sup> near the equator,**  
72 **150°E at 215 hPa in NDJFM during 2005-2017 (Fig. R1). The area-averaged**  
73 **MOPITT CO data increased at a rate of  $5.0\pm 3.1$  ppbv decade<sup>-1</sup> at 200 hPa over**  
74 **the TWP in NDJFM during 2000-2017. It should be pointed out that the linear**  
75 **trends of CO are calculated based on the satellite data which only cover 14 or 18**  
76 **years due to the data limitation here. Hence, the linear trends of CO may have**  
77 **uncertainties particularly in the regions with large interannual variations in CO.**  
78 **To partially overcome this shortage, the trends of MLS CO at 215 hPa during**

79 time periods of 2005-2016, 2006-2016, 2006-2017, and 2007-2016 and the trends  
80 of MOPITT CO at 200 hPa during time periods of 2000-2016, 2001-2016,  
81 2001-2017, and 2002-2016 are shown in Fig. R2 (Supplementary Fig. 6). It could  
82 be found that the CO near 200 hPa shows robustly increasing trends over the  
83 TWP in satellite data (both of MLS and MOPITT). Overall, though the observed  
84 CO only covers less than 20 years, the results from the satellite data may provide  
85 extra evidence for the impact of the positive trends of upward motion over the  
86 TWP on the trace gases in the upper troposphere. The above discussion is added  
87 to the revised manuscript. We hope these results may further support our main  
88 conclusions in this study.

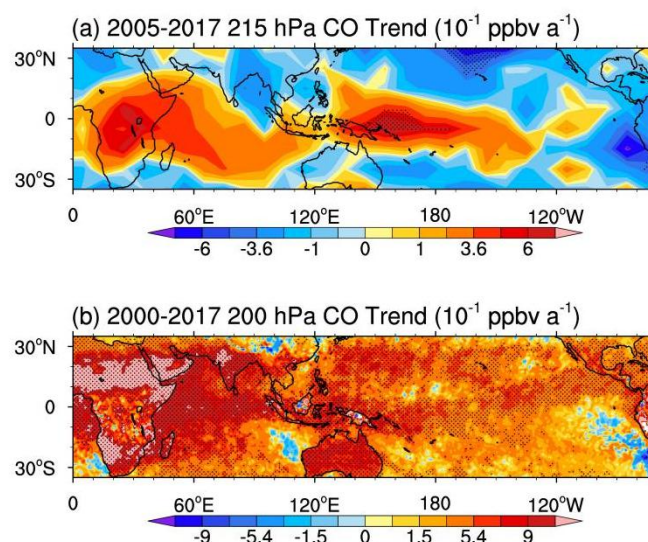

89

90 **Fig. R1.** The trends of CO derived from the MLS and MOPITT data. (a) The  
91 trends of CO ( $10^{-1}$  ppbv  $a^{-1}$ ) at 215 hPa using MLS data in NDJFM during  
92 2005-2017. (b) The trends of CO ( $10^{-1}$  ppbv  $a^{-1}$ ) at 200 hPa using MOPITT data  
93 in NDJFM during 2000-2017. The trends of CO over the dotted region are  
94 statistically significant at the 90% confidence level.

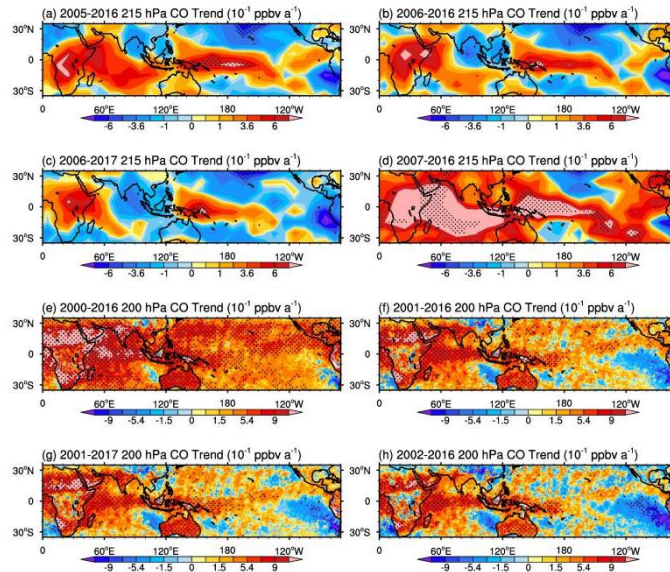

95

96 **Fig. R2.** The trends of CO derived from the MLS and MOPITT data. (a)-(d) The  
 97 trends of CO ( $10^{-1}$  ppbv  $a^{-1}$ ) at 215 hPa using MLS data in NDJFM during  
 98 periods of (a) 2005-2016; (b) 2006-2016; (c) 2006-2017; and (d) 2007-2016. (e)-(h)  
 99 The trends of CO ( $10^{-1}$  ppbv  $a^{-1}$ ) at 200 hPa using MOPITT data in NDJFM  
 100 during periods of (e) 2000-2016; (f) 2001-2016; (g) 2001-2017; and (h) 2002-2016.  
 101 The trends of CO over the dotted region are statistically significant at the 90%  
 102 confidence level.

103

104 **Specific Comments:**

105 P2 L2: 'A significantly intensified upward motion through the troposphere over the  
 106 TWP in the boreal wintertime (November to March of the next year) has been  
 107 detected.' Please make this statement more quantitative.

108 **Re: Corrected.** The phrase is rewritten as: "A significantly intensified upward  
 109 motion through the troposphere over the TWP in the boreal wintertime  
 110 (November to March of the next year, NDJFM) has been detected using multiple  
 111 reanalysis datasets. The upward motion over the TWP is intensified at rates of  
 112  $8 \pm 3.1\%$  decade $^{-1}$  and  $3.6 \pm 3.3\%$  decade $^{-1}$  in NDJFM at 150 hPa from 1958 to 2017

113 using JRA55 and ERA5 reanalysis datasets, while the MERRA2 reanalysis data  
114 show a  $7.5 \pm 7.1\%$  decade<sup>-1</sup> intensified upward motion for the period 1980-2017.”

115 P2 L18: Please specify here which reanalyses are used.

116 **Re: Added.**

117 P2 L23: 'numerical simulation' --> 'simulation with WACCM4' ?

118 **Re: Updated.**

119 P2 L24: 'show that more CO could be elevated to the tropical tropopause layer (TTL)'  
120 Please make this statement more quantitative.

121 **Re: Rephrased as: “Using CO as a tropospheric tracer, the WACCM4**  
122 **simulations show that an increase of CO at a rate of 0.4 ppbv decade<sup>-1</sup> at the**  
123 **layer 150-70 hPa in the tropics is mainly resulted from the global SST warming**  
124 **and the subsequent enhanced upward motion over the TWP in the troposphere**  
125 **and strengthened tropical upwelling of Brewer-Dobson (BD) circulation in the**  
126 **lower stratosphere.”**

127 P2 L27: Why is aerosol explicitly emphasized here. Please clarify (e.g. outflow from  
128 polluted air from South Asia?)

129 **Re: We thank the reviewer’s comment. This sentence has been rewritten as:**  
130 **“This implies that more tropospheric trace gases and aerosols from both**  
131 **natural maritime source and outflow from polluted air from South Asia may**  
132 **enter the stratosphere through the TWP region and affect the stratospheric**  
133 **chemistry and climate.”**

134 P3 L42: Please add possible sources of ozone-depleting halogen-containing  
135 substances in TWP (outflow from anthropogenic emissions from South Asia, natural  
136 maritime bromine-containing substances?).

137 **Re: We thank the reviewer’s comment. This sentence has been rewritten as:**  
138 **“Through the TWP region, tropospheric trace gases, e.g., the natural maritime**  
139 **bromine-containing substances and outflow from anthropogenic emissions from**  
140 **South Asia, are lifted to the upper troposphere by the strong upward motion and**  
141 **the deep convection and subsequently into the stratosphere by the large-scale**  
142 **upwelling (e.g., Levine et al., 2007, 2008; Navarro et al., 2015), which affect the**  
143 **ozone concentration and other chemical processes in the stratosphere (e.g., Feng**  
144 **et al., 2007; Sinnhuber et al., 2009).”**

145 P4 L45: (Saiz-Lopez and von Glasow, 2012; Wang et al., 2015). -> (e.g.  
146 Saiz-Lopez ...).

147 **Re: Corrected.**

148 P4 L46: 'the coldest tropopause' of what? Please specify.

149 **Re: Here we mean that the TWP region has the lowest tropopause temperature**  
150 **over the globe. Corrected as “At the same time, the TWP region has the lowest**  
151 **cold-point tropopause temperature (CPTT) over the globe and plays an**  
152 **important role in controlling the water vapor concentration in the stratosphere.”**

153 P4 L49: 'an important region for troposphere-to-stratosphere transport' Please add  
154 some references.

155 **Re: Added.**

156 P4 L50: Is the TWP more important for stratospheric chemistry as other regions in the  
157 atmosphere? Please clarify?

158 **Re: We thank for the reviewer’s comment. Here we want to summarize the**  
159 **importance of the TWP region. The sentence was modified as “The TWP is an**  
160 **important region for tropospheric trace gases being transported from the**  
161 **troposphere to the stratosphere, and therefore influencing the stratospheric**

162 chemistry (e.g., Fueglistaler et al., 2004; Levine et al., 2007; Krüger et al., 2008;  
163 Pan et al., 2016).”

164

165 P4 L66-70: The impact of ozone-depleting halogen-containing substances is already  
166 mentioned on P3 L42. I propose to combine these two sentences in one paragraph.

167 **Re: These sentences are combined in the first paragraph of Introduction section**  
168 **as: “Through the TWP region, tropospheric trace gases, e.g., the natural**  
169 **maritime bromine-containing substances and outflow from anthropogenic**  
170 **emissions from South Asia, are lifted to the upper troposphere by the strong**  
171 **upward motion and the deep convection and subsequently into the stratosphere**  
172 **by the large-scale upwelling (e.g., Levine et al., 2007, 2008; Navarro et al., 2015),**  
173 **which affects the ozone concentration and other chemical processes in the**  
174 **stratosphere (e.g., Feng et al., 2007; Sinnhuber et al., 2009).”**

175

176 P4 L71: 'Based on a trajectory model, Fueglistaler et al. (2004) pointed out that the  
177 TWP region is a primary source of the tropospheric air entering the stratosphere and  
178 approximately 80% of the trajectories ascending into the stratosphere enter the TTL  
179 from the TWP'. However, in L63 it is written: 'the TWP is not the dominant entry of  
180 trace gases transported from the troposphere into the lower stratosphere'. Please  
181 rephrase this statement more carefully.

182 **Re: Thanks for the comment. The statement is rephrased as: “Though the**  
183 **vertical transport from TTL to the lower stratosphere is dominated by the BD**  
184 **circulation, numerous studies confirmed that the TWP region is an important**  
185 **pathway of the surface air entering the TTL (Fueglistaler et al., 2004; Levine et**  
186 **al., 2007; Krüger et al., 2008; Haines and Esler, 2014). Based on a trajectory**  
187 **model, Fueglistaler et al. (2004) pointed out that approximately 80% of the**  
188 **trajectories ascending into the stratosphere from the TTL are originated from**  
189 **the TWP region.”**



190

191 P6 L100: 'using reanalysis datasets and model simulations' --> 'using JRA55, ERA5  
192 and MERRA2 reanalysis and different WACCAM4 simulations as described in Sect.  
193 2.'

194 **Re: Corrected.**

195

196 P6 L102: 'is also discussed.' --> ' will be discussed in Sect. 3'

197 **Re: Corrected.**

198

199 P6 L110: Please add the horizontal resolution of ERA5 data ( $0.3^\circ \times 0.3^\circ$ ), which is  
200 much higher as in JRA55 and MERRA2. What about differences in vertical and  
201 temporal resolution. Please specify.

202 **Re: Thanks for the comment. The description of the JRA55, ERA5 and**  
203 **MERRA2 datasets are rephrased in Section 2, and the information about the**  
204 **vertical, horizontal, and temporal resolution are added.**

205

206 P6 L124: 'UTLS' is not yet introduced in the text.

207 **Re: Corrected.**

208 P6 L125: 'even though there are still large biases in the reanalysis datasets' What are  
209 the differences between the three different reanalyses (JRA55, ERA5 and MERRA2)  
210 used here? Please specify.

211 **Re: According to the results of Uma et al. (2021), the description is added to the**  
212 **manuscript as: “the updrafts from the JRA55 data in the UTLS are stronger**  
213 **than those from ERA5 and MERRA2 data.” It should be mentioned that Uma et**  
214 **al. (2021) did not give quantitative differences between them.**

215

216 P8 L145: 'except that the global SSTs are fixed to the climatological mean values  
217 during 1955-2018 (long-term mean for each calendar month during 1955-2018.' Why  
218 are the SST not fixed to a value representative for the beginning of the 60-year  
219 period?

220 **Re: The Control and Fixsst simulations are designed to investigate the impact of**  
221 **SST changes on the intensified upward motion over the TWP. For this purpose,**  
222 **using the SST climatology representative for the beginning of the 60-year period**  
223 **to force the simulation should also be proper. Since we compare the trends**  
224 **between the Control (transient) and the Fixsst (constant) simulations, the state of**  
225 **the Fixsst simulation should not influence the results. The SSTs are fixed to the**  
226 **mean of 1958-2017 rather than 1960s to make the mean state of the two**  
227 **simulations more consistent with each other.**

228

229 P8 L146 Please explain the added-value of a time-slice experiment compared to the  
230 hindcast simulation.

231 **Re: Thanks for the comment. The SSTs in the hindcast simulation are prescribed**  
232 **as the observed SSTs, with changes of SSTs over the globe. SSTs in the time-slice**  
233 **simulations are only modified in the eastern maritime continent and the tropical**  
234 **western Pacific (20°S-20°N, 120°E-160°E) , which emphasizes the importance of**  
235 **the SSTs over these areas. The descriptions are clarified in the revised**  
236 **manuscript.**

237

238 P8 L150: For better motivation, please explain in more detail why this set up is used  
239 for the two time-slice simulations.

240 **Re: Thanks for the suggestion. Some explanations are added to the manuscript**  
241 **as: “To figure out the impact of the warming SST over the TWP region on the**  
242 **intensifying trend of the upward motion over the TWP region, a couple of**  
243 **time-slice simulations (R1 and R2) are also integrated for 33 years... Since the**

244 SSTs over the TWP show significantly warming trends, the SSTs during  
245 1998-2017 are higher than the SSTs during 1958-1977. Hence, the difference  
246 between R1 and R2 reflect the impact of the warmed SSTs over the TWP on the  
247 atmospheric circulation.”

248

249 P9 L171: 'the climatological distribution of the vertical velocity at 150 hPa for each  
250 month of the year.' --> Mean values of the vertical velocity at 150 hPa for each month  
251 averaged over 60 years from 1958 to 2017. Yes?

252 **Re: Yes. The statement is corrected correspondingly.**

253 Why is JRA55 and not ERA5 or MERRA2 selected for Fig.1? What are the difference  
254 between JRA55 and ERA5/MERRA2?

255 **Re: The pattern of the 150 hPa vertical velocity from JRA55 data shown in Fig. 1**  
256 **is similar to the patterns of the 150 hPa vertical velocity from ERA5 and**  
257 **MERRA2 datasets. To avoid repetition, only the result from JRA55 data is**  
258 **shown in Fig. 1. According to the referee's comment, the climatological mean**  
259 **vertical velocity in NDJFM in ERA5 and MERRA2 is added to the**  
260 **supplementary material. The vertical velocity differences between JRA55 and**  
261 **the ERA5 and MEERA2 data are further discussed in the revised manuscript.**

262 P9 L180: please add text within ++: 'which is more important to the transport of air  
263 over the TWP from the lower troposphere to the TTL +compared to the summer  
264 months (as shown in Fig. 1) + and subsequently to the lower stratosphere.

265 **Re: Corrected.**

266 P9 L182: 'Notably, the 150 hPa w shows no subsidence over the maritime continent,  
267 while there is descending motion over the maritime continent at 100 hPa (not shown),  
268 which is referred to the “stratospheric drain” (Gettleman et al., 2000; Sherwood,  
269 2000).' The 100 hPa values should be shown in an electronic supplement.

270 **Re: The 100 hPa  $w$  values using JRA55, ERA5 and MERRA2 are shown in**  
271 **Supplementary Fig. 2.**

272 P10 L186: Please explain in detail how the trend is calculated.

273 **Re: We thank for the reviewer's suggestion. The description about the trend and**  
274 **the significance test is added to Section 2 as:**

275 **“Linear trends and the significance test. The linear trends are estimated**  
276 **using a simple least square regression method. The significances of the**  
277 **correlation coefficients, mean differences, and trends are determined via a**  
278 **two-tail Student's t-test. The confidence interval of trend is calculated using the**  
279 **following equation (Shirley et al., 2004):**  $\left( b - t_{1-\frac{\alpha}{2}}(n-2)\sigma_b, b + t_{1-\frac{\alpha}{2}}(n-2)\sigma \right)$

280 **where  $b$  is the estimated slope,  $\sigma$  denotes the standard error of the slope, and**  
281  **$t_{1-\frac{\alpha}{2}}(n-2)$  represents the value of t-distribution with the degree of freedom**  
282 **equal to  $n-2$ .  $\alpha$  is the two-tailed confidence level.  $\sigma$  is calculated as:**

$$283 \sigma = b \sqrt{\frac{\frac{1}{r^2} - 1}{n-2}}.$$

284 P10 L187: 'using reanalysis datasets' -> 'using JARA55, ERA5 and MERRA2  
285 reanalyses.'

286 **Re: Corrected.**

287 P10 L191: ->'is intensifying through the troposphere from 1958 to 2017.'

288 **Re: Corrected.**

289 P10 L193 : add 'used here' or 'used in this study'

290 **Re: Added.**

291 Figure 2: In MERRA2 the horizontal winds seems to be much stronger compared to  
292 JARA55 and ERA5. Could you make a comment on this. Please discuss the  
293 similarities and differences of the three reanalyses in more detail. Maybe you could  
294 show an additional figure showing the differences of ERA5 and MERRA2 compared  
295 to JARA55. ERA5 has much higher spacial and temporal resolution as JRA55 and  
296 MERRA2, therefore I would expect pronounced differences to JARA55 and  
297 MERRA2, in particular convection is much improved compared to the previous  
298 ECMWF reanalysis ERA-Interim.

299 **Re: Thanks for the comment. In Fig. 2, the trends of the horizontal winds seem**  
300 **to be much stronger in MERRA2 compared to JRA55 and ERA5. It should be**  
301 **noted that the wind trends in JRA55 and ERA5 are calculated during the period**  
302 **1958-2017, however, the wind trends of in MERRA2 are calculated during the**  
303 **period 1980-2017. To further figure out whether there are large differences**  
304 **between the trends of the winds between JRA55, ERA5 and MERRA2, the**  
305 **trends of winds during 1980-2017 in NDJFM derived from JRA55, ERA5 and**  
306 **MERRA2 are shown here (and in the supplementary material). It could be seen**  
307 **that the trends of horizontal winds in Figs. R3a and R3b are larger than the**  
308 **trends of horizontal winds in Figs. 2a and 2b (in manuscript). And there are**  
309 **insignificant differences between the trends of horizontal winds in JRA55, ERA5,**  
310 **and MERRA2. Hence, the differences of the trends of the horizontal winds in Fig.**  
311 **2 are mainly due to the different time periods which are used to calculate the**  
312 **trends. The trend patterns of the winds in JRA55, ERA5, and MERRA2 are**  
313 **similar. However, there are also some differences between the trends of vertical**  
314 **velocity in JRA55, ERA5, and MERRA2. There are significantly positive trends**  
315 **over the TWP regions in JRA55, ERA5, and MERRA2, while the positive trends**  
316 **of vertical velocity over the TWP in ERA5 seem to be weaker than those in**  
317 **JRA55 and MERRA2. Comparing to the negative trends of the vertical velocity**

318 over the central Pacific in JRA55 and ERA5, the negative trends of the vertical  
 319 velocity over the central Pacific in MERRA2 extend more northward. The above  
 320 discussion is added to the corresponding paragraph in the revised manuscript.

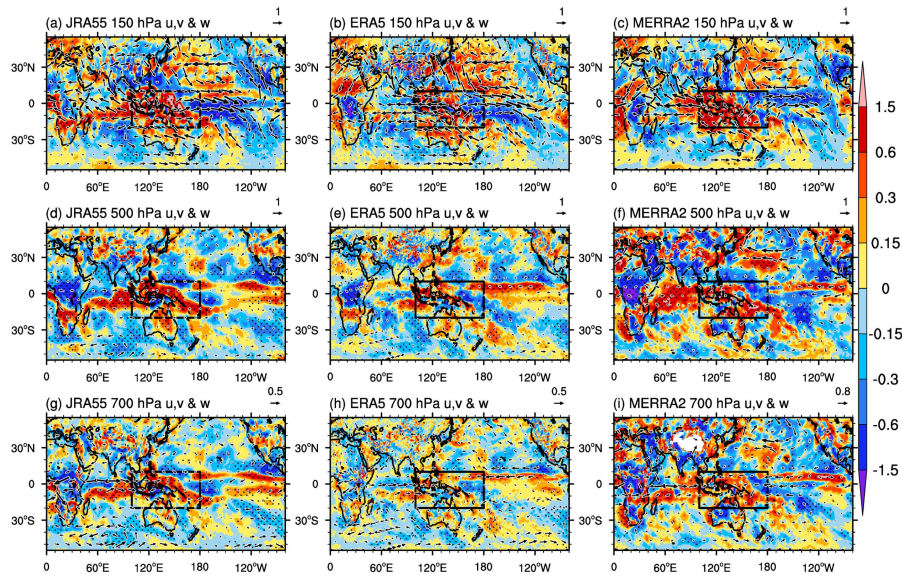

321

322

323 **Fig. R3. The trends of the vertical velocity and horizontal winds in NDJFM using**  
 324 **JRA55 (a, d, g), ERA5(b, e, h) and MERRA2(c, f, i) data during 1980-2017 at**  
 325 **different levels. (a)-(c) are the trends of winds at 150 hPa. (d)-(f) are the trends of**  
 326 **winds at 500 hPa. (g)-(i) are the trends of winds at 700 hPa. The trends of**  
 327 **vertical velocity over the dotted region are statistically significant at the 90%**  
 328 **confidence level.**

329

330 Figure 3: Please Explain how 'standardized intensity' is calculated. What is the reason  
 331 for the extreme minima (1981, 1991, 1999)? El Niño Southern Oscillation (ENSO)?

332 **Re: “The intensity of the upward motion over the TWP is simply defined as the**  
 333 **area-averaged upward mass flux at a specific level. And the standardized**  
 334 **intensity is the intensity divided by the standard deviation of the intensity at the**  
 335 **corresponding level.” The explanation of the standardized intensity is added to**

336 the manuscript. The extreme minima (actually, the years are 1982, 1991, and  
337 1997) are mainly due to the ENSO events (El Niño), which may result in a weak  
338 upward motion over the TWP (e.g., Levine et al., 2008; Hosking et al., 2012; Hu  
339 et al., 2016). To figure out the influence of the El Niño events (1982, 1991, 1997),  
340 the time series of the standardized intensity of the upward motion over the TWP  
341 in NDJFM after removing the ENSO signal using the linear regression method  
342 (Hu et al., 2018) in JRA55, ERA5, and MERRA2 are shown here (Fig. R4 and  
343 Supplementary Fig. 5). It could be seen that the extreme minima become much  
344 weaker after removing the ENSO signal using the linear regression method. This  
345 result suggests that the El Niño events could affect the upward motion over the  
346 TWP and to a large extent result in the extreme minima (1982, 1991, and 1997).  
347 Notably, the upward motions over the TWP at 150 hPa, 500 hPa, and 700 hPa in  
348 NDJFM in JRA55, ERA5, and MERRA2 still show statistically significant  
349 intensifying trends after removing the ENSO signal in Supplementary Fig. 5,  
350 which suggests that ENSO events exert limited impacts on the trends of the  
351 upward motion over the TWP in NDJFM during 1958-2017. Some of above  
352 discussions are added to the revised manuscript.

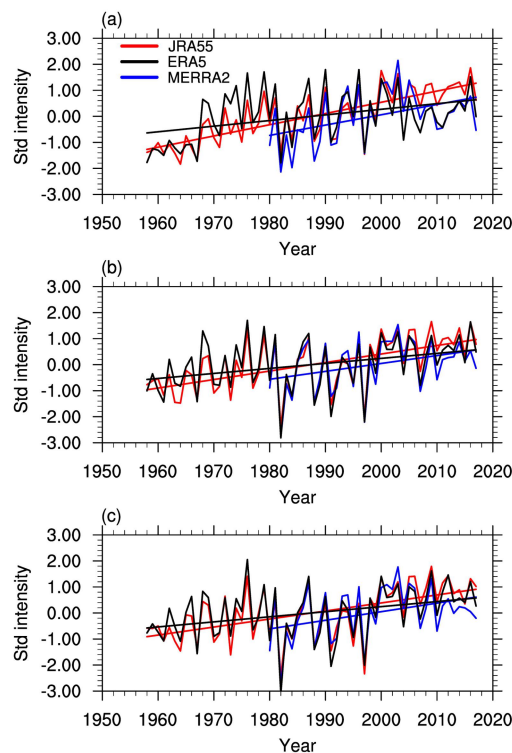

354 **Fig. R4. The time series of the standardized intensity of the upward motion over**  
355 **the tropical western Pacific (20°S-10°N, 100°E-180°E) at (a) 150 hPa; (b) 500 hPa;**  
356 **and (c) 700 hPa extracted from JRA55 (red), ERA5 (black) and MERRA2 (blue)**  
357 **datasets after removing the ENSO signal using linear regression method. The**  
358 **straight lines in each figure indicate the linear trends. The linear trends of the**  
359 **upward motion intensity over the TWP at 150 hPa, 500 hPa, and 700 hPa from**  
360 **three datasets are statistically significant at the 95% confidence level.**

361

362 P10 L201: 'This suggests a comprehensive enhancement of vertical velocity though  
363 the whole troposphere, which is evident from the surface to 100 hPa (not shown).'  
364 Figures demonstrating this could be shown in an electronic supplement.

365 **Re: The trends of vertical velocity from the surface to 100 hPa in NDJFM**  
366 **derived from JRA55, ERA5, and MERRA2 are added in the supplementary**  
367 **material (Supplementary Fig. 4)**

368

369 P10 L205 : 'Due to the data limitation, it is not possible to show the corresponding  
370 changes of trace gases by observations.' I agree that it is difficult to find observation  
371 from 1958 to 2017. However satellite measurements from shorter time period could  
372 be used (e.g. MLS CO available since August 2004; <https://mls.jpl.nasa.gov>).

373 **Re: We thank for the referee's comment. An extra figure showing the trends of**  
374 **CO observed by MOPITT and MLS at around 200 hPa during 2000-2017 and**  
375 **2005-2017 is added in the revised manuscript. The details could be found in the**  
376 **responses to the major comments above.**

377

378 P11 L210: 'of observed OLR' --> 'of observed OLR provided by NOAA (see Sect.  
379 2)'

380 **Re: Corrected.**



381 P11 L222: 'CPTT' is not yet introduced. Fig. 4b is not referred to in the text --> '.. the  
382 cold-point tropopause temperature (CPTT; see Fig. 4b) shows significantly decreasing  
383 trends over the TWP in NDJFM during 1958-2017,... However negative trends are  
384 also found in other regions in low and mid-altitudes, except in the Pacific.'

385 **Re: CPTT is introduced in the revised manuscript *Line 55*. The statement is**  
386 **corrected.**

387 P12 L242: 'The SSTs over the TWP are positively correlated with the upward motion  
388 intensity over the TWP, while the SSTs over tropical central, eastern Pacific, and  
389 Indian Ocean show negative correlations.' I am wondering that the positive correlation  
390 pattern is somewhat shifted to the east, then the western part of the maritime continent  
391 (100°E-120°E) is also negative correlated. However, in the western part of the  
392 maritime continent (100°E-120°E) the trends of horizontal winds (Fig. 2) are large.  
393 Maybe, it is useful to avoid misunderstandings to mark the region of the TWP  
394 somehow (e.g. by a box).

395 **Re: We are sorry for the possible confusion. The TWP is marked by a box in the**  
396 **figures of the revised manuscript, and the corresponding statement is corrected**  
397 **to avoid the confusion.**

398

399 P13 L253: 'a couple of model simulations' --> 'a couple of model simulations with  
400 WACCAM4'

401 **Re: Corrected.**

402 P14 L277: 'a couple of time-slice runs (R1 and R2) are performed (more details are  
403 given in the section 2).' --> It is maybe a matter of taste, but I would prefer in  
404 general to say 'simulations instead of 'run'. Please repeat the main features of R1 and  
405 R2 as a reminder for the reader.

406 **Re: Corrected. And the main features of R1 and R2 are added to the**  
407 **corresponding paragraph.**

408

409 P14 L289: 'The changes in the OLR' --> 'The changes in the OLR simulated in  
410 WACCAM4'

411 **Re: Corrected.**

412 P15 L300: 'We now discuss about the relationship between the trends of the upward  
413 motion over the TWP and the changes of the trace gases in the lower stratosphere.'  
414 -->'The relationship between the trends of the upward motion over the TWP and the  
415 change of CO and water vapor in the lower stratosphere simulated with WACCAM4  
416 will be analyzed. It is expected, that a positive trend in the upward motion over the  
417 TWP yield higher CO in the lower stratosphere caused be enhanced vertical upward  
418 transport. However, water vapor mixing ratios in the lower stratosphere depends in  
419 addition from the temperature in the UTLS ....' Is that what you would like to discuss  
420 here?

421 **Re: Yes. The corresponding phrases are corrected.**

422 Section 3.3 is written somewhat confusing, therefore I propose to write a short  
423 introduction of Sect. 3.3 summarizing previous results from the literature and  
424 subsequent the new results of Qie et al.

425 **Re: Thanks for the comment. A short introduction of Section 3.3 is added to the**  
426 **manuscript according to the comments of the referee and the literature.**

427 **“Previous studies showed that the enhanced deep convection and upward motion**  
428 **could lead to increased CO in the UTLS (e.g., Duncan et al., 2007; Livesey et al.,**  
429 **2013). At the same time, water vapor mixing ratios in the UTLS may increase**  
430 **due to the enhanced upward motion which could bring more wet air from low**  
431 **altitude to high altitude (e.g., Rosenlof, 2003; Lu et al., 2020). However, the water**

432 vapor mixing ratios in the lower stratosphere also depend on the tropopause  
433 temperature (e.g., Highwood and Hoskins, 1998; Garfinkel et al., 2018; Pan et al.,  
434 2019). Hence, the relationship between the intensity of upward motion and the  
435 water vapor concentration in the UTLS is complex. Here, the relationship  
436 between the trends of the upward motion over the TWP and the changes in CO  
437 and water vapor in the ULTS simulated with WACCM4 are analyzed.”

438

439 P15 L303: 'in different simulations are displayed' --> 'are shown based on the Control  
440 and the Fixsst simulation as well as using their difference..'

441 **Re: Corrected.**

442 P15 L303: --> 'in Fig. 7d-i'

443 **Re: Corrected.**

444

445 P16 L328: 'As mentioned above in section 3.1, the observed tracer gases (e.g., CO)  
446 have very limited data record and may be affected by a mixture of anthropogenic and  
447 natural (e.g., biomass burning) emissions and the ENSO events (e.g., Duncan et al.,  
448 2007; Logan et al., 2008). It is therefore very hard to identify the relative contribution  
449 of single factors.' This sentence is here not very helpful, please remove it.

450 **Re: Removed.**

451 P16 L332: 'We utilize the numeric simulations' --> 'We use the Control and the Fixsst  
452 simulation with WACCAM4 ..'

453 **Re: Corrected.**

454

455 P17 L344: 'increasing trends over the TWP' How much is the increase in CO within  
456 60 years? Please add some numbers in the text. ( $4 \times 10^{-4}$  ppm per year -> 0.024  
457 ppm change in CO in 60 years; that seems not to be much.)

458 Give some reference about CO values and variability of CO in this region from  
459 measurements to assess the trend in CO over TWP.

460 **Re: Thanks for the suggestion. We show the climatological mean CO values at**  
461 **215 hPa in NDJFM from MLS observations during 2005-2017 and at 200 hPa in**  
462 **NDJFM from MOPITT observations during 2000-2017. The concentration of**  
463 **MLS CO over the TWP is approximately 80 ppbv at 215 hPa and MOPITT CO**  
464 **is 70 ppbv at 200 hPa, which is consistent with previous study (e.g., Huang et al.,**  
465 **2016). The increasing trends of CO at 150 hPa over the TWP in the Control and**  
466 **Fixsst simulations are approximately 3.4 ppbv decade<sup>-1</sup> (20.4 ppbv within 60**  
467 **years) and 3.2 ppbv decade<sup>-1</sup> (19.2 ppbv within 60 years). The CO at 150 hPa**  
468 **over the TWP derived from the difference between the Control and Fixsst**  
469 **increased 0.2 ppbv decade<sup>-1</sup> (1.2 ppbv within 60 years), which suggests that the**  
470 **enhanced deep convection and intensified upward motion could lead to an extra**  
471 **6% increasing trend of CO at 150 hPa over the TWP. It should be mentioned**  
472 **that the changes in the CO at 150 hPa caused by the intensified upward motion**  
473 **over the TWP not only depend on the vertical transport but also on the gradient**  
474 **of CO concentration at around 150 hPa (Garfinkel et al., 2013). This may be the**  
475 **reason why the intensifying upward motion over the TWP only contribute to an**  
476 **extra 6% increasing trend of CO at 150 hPa in NDJFM during 1958-2017. For**  
477 **example, CO derived from the difference between the Control and Fixsst**  
478 **simulations shows higher increasing trends in the layer 150-70 hPa (0.4 ppbv**  
479 **decade<sup>-1</sup>) than those at 150 hPa (0.2 ppbv decade<sup>-1</sup>), which is due to the greater**  
480 **CO gradient in the UTLS comparing to the CO gradient in the upper**  
481 **troposphere.**

482

483 P17 L354: 'This is consistent with our results which show intensified northerlies over  
484 the subtropical Indian Ocean and strengthened westerlies over the subtropical Indian  
485 Ocean and western Pacific'

486 Please add some numbers in the text: how much is the strengthening. Is it a large or  
487 weak change. Please give the reader some numbers to assess this change.

488 **Re: Thanks for the suggestion. The trends of the northerlies over the subtropical**  
489 **Indian Ocean (15°S-25°S, 60°E-100°E) are approximately 0.2 m s<sup>-1</sup> decade<sup>-1</sup> and**  
490 **the trends of westerlies over the subtropical Indian Ocean and western Pacific**  
491 **(20°N-35°N, 60°E-160°E) are approximately 0.3 m s<sup>-1</sup> decade<sup>-1</sup> (Figs. 5c and f).**  
492 **The discussion is added to the revised manuscript.**

493

494 P18 L377: 'In summary, the increase of CO as shown in Figs. 8a-8b is mainly caused  
495 by surface emissions.' My understanding is that the surface emissions are the same in  
496 the Control and Fixsst simulation and that the increase of UTLS CO is caused by  
497 stronger upwelling. Please clarify.

498 **Re: We are sorry for the confusion. The surface emissions are the same in the**  
499 **Control and Fixsst simulations, which are increasing in NDJFM during**  
500 **1958-2017. Hence, the trends of CO in Fig. 9a (in the revised manuscript) contain**  
501 **the CO trends induced both by the increased surface emissions and the enhanced**  
502 **upward motion. The trends of CO over the TWP in Fig. 9b (in the revised**  
503 **manuscript) only include the CO trends induced by the increased surface**  
504 **emissions since the upward motion over the TWP in the Fixsst simulation shows**  
505 **weak trends. Furthermore, the CO increased through the troposphere over the**  
506 **TWP using the difference between the Control and Fixsst simulations, which**  
507 **suggests that the increase of CO in the upper troposphere in Fig. 9c (in the**  
508 **revised manuscript) is caused by the intensified upward motion over the TWP.**  
509 **Some discussions are added to the text.**

510

511 Figure 11: '(a) Control run; (b) Fixsst run; (c) difference between the Control run and  
512 the Fixsst run; and (d) JRA55.' --> labels a,b,c,d are not consistent to Fig.11.

513 **Re: We are sorry for the mistake. The figure caption is corrected.**

514

515 Why is MERRA2 and ERA5 not shown. How is the trend of the BD circulation  
516 calculated? Are zonal mean values shown? Please clarify.

517 **Re: Thanks for the suggestion. We have added the trends of the BDC derived**  
518 **from ERA5 and MERRA2 to the supplementary material. The trend of the BDC**  
519 **is calculated using the simple least square regression. The  $w^*$  used in the**  
520 **manuscript is calculated using the TEM formula and  $w^*$  denotes the monthly**  
521 **zonal mean of the vertical component of the BDC. To avoid confusion, the  $\bar{w}^*$**   
522 **and  $\bar{v}^*$  in the equation mentioned in the original manuscript are corrected as**  
523  **$w^*$  and  $v^*$  in the revised manuscript.**

524

525 P19 L384: 'The tropical upwelling of BDC ( $w^*$ ) are significantly increased in the  
526 lower stratosphere over past decades as seen in both reanalysis data and the control  
527 run (Figs. 11a and b).' --> 'in JARA55 and control simulation'

528 **Re: Corrected.**

529

530 Please indicate that the TEM is used to calculate  $w^*$ . Please specify 'significantly  
531 increased' with some numbers. Please compare the increase with numbers from other  
532 references.

533 **Re: We thank the referee's comment. The manuscript is revised correspondingly.**

534 **The quantitative results and the comparison with other references are added.**

535 **The tropical upwelling of BDC ( $w^*$ ) calculated using the TEM formula increased**  
536 **significantly in the lower stratosphere over past decades as seen in the JRA55**  
537 **data and the Control simulation (Figs. 12a and 12b). We found that the 70 hPa**  
538 **upward mass flux in NDJFM in the tropics (15°S-15°N) increased  $2.8 \pm 1.9\%$**   
539 **decade<sup>-1</sup> ( significant at the 95% confidence level) in the JRA55 data from 1958**

540 to 2017 (Fig. 12a) and  $4.6 \pm 4.3\%$  decade<sup>-1</sup> ( significant at the 95% confidence level)  
541 in the MERRA2 data from 1980 to 2017 (Supplementary Fig. 7b). From the  
542 ERA5 data, the 70 hPa upward mass flux in NDJFM increased in the north  
543 hemisphere (0-15°N) at a rate of  $5 \pm 2.8\%$  decade<sup>-1</sup> ( significant at the 95%  
544 confidence level), but decreased significantly in the south hemisphere (0-15°S)  
545 during 1958-2017 (Supplementary Fig. 7a). On average, the trend of the 70 hPa  
546 upward mass flux in NDJFM in the tropics (15°S-15°N) is insignificant in ERA5.  
547 In fact, many previous studies have investigated the trends of BDC. For example,  
548 Abalos et al. (2015) investigated the trends of BDC using JRA55, MERRA, and  
549 ERA-Interim data during 1979-2012 and suggested that the BDC in JRA55 and  
550 MERRA significantly strengthened throughout the layer 100-10 hPa with a rate  
551 of 2-5% decade<sup>-1</sup>, while the BDC in ERA-Interim shows weakening trends. Diallo  
552 et al. (2021) compared the trends of the BDC in the ERA5 and ERA-Interim  
553 during 1979-2018 and pointed out that the BDC in the ERA-Interim shows  
554 weakening trend and the BDC in the ERA5 strengthened at a rate of 1.5%  
555 decade<sup>-1</sup> which is more consistent with other studies. In the present study, we  
556 only focus on the trend of the BDC in the wintertime (NDJFM) in the tropics  
557 (15°S-15°N) during 1958-2017, which may lead to some differences between our  
558 result and the previous studies. Overall, the trends of the tropical upwelling of  
559 BDC using JRA55, MERRA2 data and the Control simulation are similar to the  
560 previous studies using both reanalysis datasets and model results (e.g., Butchart  
561 et al., 2010; Abalos et al., 2015; Fu et al., 2019; Rao et al., 2019; Diallo et al.,  
562 2021). However, the tropical upwelling of the BDC decreased using ERA5 data  
563 in the tropics (15°S-15°N), which are different from the results in JRA55 and  
564 MERRA2. In summary, the tropical upwelling of the BD circulation is likely  
565 strengthened as shown in JRA55 and MERRA2 reanalyses as well as model  
566 simulations, although there are some uncertainties since the ERA5 data show a  
567 negative trend. This may contribute to the transport of the tropospheric trace  
568 gases from the TTL to a higher level. The increased concentration of CO in the  
569 UTLS in Fig. 9c and 10f may be due to a combined effect of the strengthened

570 tropical upwelling of the BD circulation and the enhanced upward motion over  
571 the TWP.

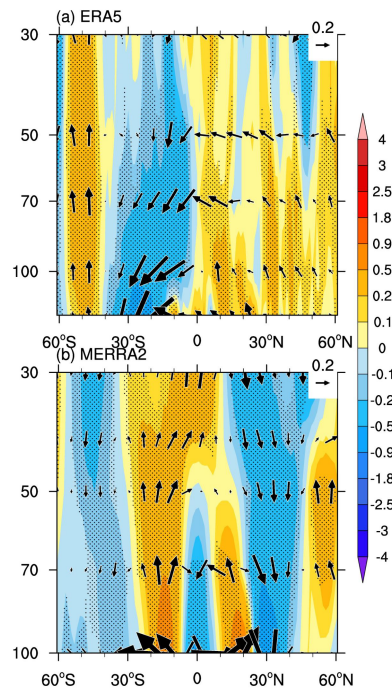

572

573 **Fig. R5.** The trends of the BD circulation (vectors) calculated using the TEM  
574 formula using ERA5 and MERRA2 data. (a) The trends of  $w^*$  ( $10^{-5} \text{ m s}^{-1} \text{ a}^{-1}$ ) and  
575  $v^*$  ( $10^{-2} \text{ m s}^{-1} \text{ a}^{-1}$ ) in NDJFM during 1958-2017 using ERA5 data. (b) The trends  
576 of  $w^*$  ( $10^{-5} \text{ m s}^{-1} \text{ a}^{-1}$ ) and  $v^*$  ( $10^{-2} \text{ m s}^{-1} \text{ a}^{-1}$ ) in NDJFM during 1980-2017 using  
577 MERRA2 data. The shadings are the trends of the vertical velocities ( $10^{-5} \text{ m s}^{-1}$   
578  $\text{a}^{-1}$ ). The trends of the vertical velocity over the dotted regions are statistically  
579 significant at the 90% confidence level.

580

581 P19 L400: 'The recent trends of the upward motion from the lower to the upper  
582 troposphere in boreal winter over the TWP is investigated for the first time based on  
583 the reanalysis datasets and model simulations.' Specify which reanalysis and which  
584 model runs are used.

585 **Re: Corrected.**

586



587 P19 L405: 'Warmer SSTs over the TWP lead to a strengthened Pacific Walker  
588 circulation, enhanced deep convection and stronger upward motion over the TWP.'  
589 Please make this statement more quantitative. From the analysis it is not clear for me  
590 what is enhanced: convection or subsequent upward motion over the TWP by diabatic  
591 heating or both.

592 **Re: Thanks for the suggestion. The statement is rephrased. Both of the deep**  
593 **convection and the subsequent upward motion over the TWP by diabatic heating**  
594 **are enhanced. We are sorry for the confusion.**

595

596 How is downward transport over TWP by the Pacific Walker circulation during El  
597 Niño considered within the analysis? Please clarify?

598 **Re: Thanks for the comment. The impact of ENSO events on the upward motion**  
599 **over the TWP is discussed in the revised manuscript according to the referee's**  
600 **suggestion. Some discussions are also added in the Summary and Discussion.**

601 P20 L410:' Model simulations indicate that the CO concentration increases  
602 significantly from the surface to the stratosphere with increased surface emissions.'  
603 Please make the statement more quantitative.

604 **Re: Thanks for the comment. The statement is rephrased as: "Results from the**  
605 **Control simulation indicate that the CO concentration increased significantly**  
606 **from the surface to the stratosphere over the TWP. The CO at 150 hPa increased**  
607 **at a rate of approximately 3.4 ppbv decade<sup>-1</sup> with increased surface emissions**  
608 **and the enhanced upward motion over the TWP. Specifically, an enhancement of**  
609 **tropospheric upward motion and subsequent upward transport of trace gases**  
610 **over the TWP lead to an extra 6% increasing trend of CO concentrations in the**  
611 **upper troposphere. Furthermore, the upward mass fluxes at 70 hPa in the**  
612 **tropics (15°S-15°N) show strengthening trends at rates of 2.8±1.9% decade<sup>-1</sup> and**  
613 **4.6±4.3% decade<sup>-1</sup> in JRA55 data (during 1958-2017) and MERRA2 data (during**

614 **1980-2017), respectively, which is consistent with previous studies (e.g., Butchart**  
615 **et al., 2010; Fu et al., 2019; Rao et al., 2019)."**

616

617 P20 L417: 'Trace gases and aerosols in the stratosphere have important impacts on the  
618 stratospheric processes, and hence influence the troposphere weather and climate  
619 through their radiative and dynamical feedback'. This statement is very general.  
620 Please be more specific here.

621 **Re: We thank the referee's comment. The statement is rephrased as: "Trace**  
622 **gases and aerosols entering the stratosphere from the troposphere have**  
623 **important impacts on the stratospheric processes. For example, ozone-depleting**  
624 **substances, CH<sub>4</sub> and N<sub>2</sub>O could influence on the stratospheric ozone significantly**  
625 **(e.g., Shindell et al., 2013; Wang et al., 2014; WMO, 2018), which also modify the**  
626 **temperature in the stratosphere significantly through their strong radiative**  
627 **effects. Water vapor in the lower stratosphere, in particular, has a significant**  
628 **warming effect on the surface climate (Solomon et al., 2010). Therefore, changes**  
629 **of trace gases in the UTLS have important impacts on both tropospheric and**  
630 **stratospheric climate."**

631 My impression is that the conclusion section should be revised to summarize the  
632 results of Qie et al in a much more quantitative way.

633 **Re: Thanks for the referee's suggestion. The conclusion section is revised**  
634 **according to the quantitative results in the revised manuscript.**

635 **The conclusion section is rewritten as:**

636 **"The recent trends of the upward motion from the lower to the upper**  
637 **troposphere in boreal winter over the TWP is investigated for the first time based**  
638 **on the JRA55, ERA5, MERRA2 datasets and four WACCM4 simulations (more**  
639 **details could be found in Section 2). The upward motion at 150 hPa over the**  
640 **TWP in NDJFM increased  $8\pm 3.1\%$  decade<sup>-1</sup> and  $3.6\pm 3.3\%$  decade<sup>-1</sup> in NDJFM**  
641 **from 1958 to 2017 in JRA55 and ERA5 reanalysis datasets, respectively. Despite**

642 the possible discontinuities between the radiosonde era (after 1958) and the  
643 satellite era (after 1979), the upward motion at 150 hPa over the TWP in NDJFM  
644 increased  $7.5\pm 7.1\%$  decade<sup>-1</sup> during 1980-2017 in MERRA2 data. Such  
645 intensification of the upward motion over the TWP also exist in the middle- and  
646 lower-troposphere in NDJFM in JRA55, ERA5, and MERRA2, which can be  
647 confirmed by the WACCM4 model simulations. Comparing the results between  
648 the Control and Fixsst simulations with WACCM4, it is found that the trend of  
649 the upward motion over the TWP is closely related to the changes in global SSTs,  
650 especially the SST warming over the eastern maritime continent and tropical  
651 western Pacific (see the results from the experiments R1 and R2 in Fig. 7).  
652 Warmer SSTs over the eastern maritime continent and tropical western Pacific  
653 (approximately 0.5 K) lead to a strengthened Pacific Walker circulation,  
654 enhanced deep convection and approximately 27% intensified upward motion at  
655 150 hPa over the TWP as shown by the results from the experiments R1 and R2.  
656 The enhanced deep convection over the TWP could lead to a dryer lower  
657 stratosphere over the TWP, as the strong upward motion and the Rossby-Kelvin  
658 wave responses induce a colder tropopause over the TWP. It should be pointed  
659 out that the results in the present study are mainly based on the reanalyses data,  
660 and some uncertainties may exist. More observational data are expected to be  
661 used to obtain a more robust result in the future.

662 Results from the Control simulation indicate that the CO concentrations  
663 increased significantly from the surface to the stratosphere over the TWP. The  
664 CO at 150 hPa increased at a rate of approximately 3.4 ppbv decade<sup>-1</sup> with  
665 increased surface emissions and the enhanced upward motion over the TWP.  
666 Specifically, an enhancement of tropospheric upward motion and subsequent  
667 upward transport of trace gases over the TWP lead to an extra 6% increasing  
668 trend of CO concentrations in the upper troposphere.

669 Furthermore, the upward mass fluxes at 70 hPa in the tropics (15°S-15°N)  
670 show strengthening trends at rates of  $2.8\pm 1.9\%$  decade<sup>-1</sup> and  $4.6\pm 4.3\%$  decade<sup>-1</sup>  
671 using JRA55 data (during 1958-2017) and MERRA2 data (during 1980-2017) in

672 NDJFM, which is consistent with previous studies (e.g., Butchart et al., 2010; Fu  
673 et al., 2019; Rao et al., 2019). However, such enhancement in tropical upward  
674 mass flux at 70 hPa has large uncertainties since the ERA5 data show a negative  
675 and insignificant trend (Supplementary Fig. 7a). The results from the Control  
676 and Fixsst simulations indicate that the elevated CO in the upper troposphere is  
677 further uplifted to the lower stratosphere by the intensified tropical upwelling of  
678 the BD circulation due mainly to global SST warming and lead to an increase of  
679 CO in the lower stratosphere. An extra 14% increasing trend of CO at the layer  
680 150-70 hPa over the TWP is derived from the Control and Fixsst simulations...”

681

#### 682 **References:**

- 683 **Abalos, M., Legras, B., Ploeger, F., and Randel, W. J.: Evaluating the advective**  
684 **Brewer-Dobson circulation in three reanalyses for the period 1979-2012, J.**  
685 **Geophys. Res., 120,7534-7554, doi:10.1002/2015JD023182, 2015.**
- 686 **Butchart, N., Cionni, I., Eyring, V., Shepherd, T. G., Waugh, D. W., Akiyoshi, H.,**  
687 **Austin, J., Brühl, C., Chipperfield, M. P., Cordero, E., Dameris, M., Deckert,**  
688 **R., Dhomse, S., Frith, S. M., Garcia, R. R., Gettelman, A., Giorgetta, M. A.,**  
689 **Kinnison, D. E., Li, F., Mancini, E., McLandress, C., Pawson, S., Pitari, G.,**  
690 **Plummer, D. A., Rozanov, E., Sassi, F., Scinocca, J. F., Shibata, K., Steil, B.,**  
691 **and Tian, W.: Chemistry–Climate Model simulations of twenty-first century**  
692 **stratospheric climate and circulation changes, J. Climate, 23, 5349–5374,**  
693 **<https://doi.org/10.1175/2010JCLI3404.1>, 2010.**
- 694 **Deeter, M. N., Edwards, D. P., Francis, G. L., Gille, J. C., Mao, D.,**  
695 **Martinez-Alonso, S., Worden, H. M., Ziskin, D., and Andreae, M. O.:**  
696 **Radiance-based retrieval bias mitigation for the MOPITT instrument: the**  
697 **version 8 product, Atmos. Meas. Tech., 12, 4561–4580,**  
698 **<https://doi.org/10.5194/amt-12-4561-2019>, 2019.**
- 699 **Diallo, M., Ern, M., and Ploeger, F.: The advective Brewer–Dobson circulation**  
700 **in the ERA5 reanalysis: climatology, variability, and trends, Atmos. Chem.**  
701 **Phys., 21, 7515–7544, <https://doi.org/10.5194/acp-21-7515-2021>, 2021.**

702 **Duncan, B. N., Logan J. A., Bey, I., Megretskaia, I. A., Yantosca, R. M., Novelli, P.**  
703 **C., Jones, N. B. and Rinsland, C. P.: Global budget of CO, 1988-1997:**  
704 **Source estimates and validation with a global model, J. Geophys. Res., 112,**  
705 **D22301, doi:10.1029/2007JD008459, 2007.**

706 **Fu, Q., Solomon, S., Pahlavan, H. A., and Lin, P.: Observed changes in**  
707 **Brewer–Dobson circulation for 1980–2018, Environ. Res. Lett., 14, 114 026,**  
708 **<https://doi.org/10.1088/1748-9326/ab4de7>, 2019.**

709 **Fueglistaler, S., Wernli, H., and Peter, T.: Tropical troposphere-to-stratosphere**  
710 **transport inferred from trajectory calculations, J. Geophys. Res., 109,**  
711 **D03108, doi:10.1029/2003JD004069, 2004.**

712 **Garfinkel, C. I., Waugh, D. W., Oman, L. D., Wang, L., and Hurwitz, M. M.:**  
713 **Temperature trends in the tropical upper troposphere and lower**  
714 **stratosphere: Connections with sea surface temperatures and implications**  
715 **for water vapor and ozone, J. Geophys. Res., 118, 9658-9672,**  
716 **doi:10.1002/jgrd.50772, 2013.**

717 **Garfinkel, C. O., Gordon, A., Oman, L. D., Li, F., Davis, S., and Pawson, S.:**  
718 **Nonlinear response of tropical lower-stratospheric temperature and water**  
719 **vapor to ENSO, Atmos. Chem. Phys., 18, 4597-4615,**  
720 **<https://doi.org/10.5194/acp-18-4597-2018>, 2018.**

721 **Gottelman, A., Holton, J. R., and Douglass, A. R.: Simulations of water vapor in**  
722 **the lower stratosphere and upper troposphere, J. Geophys. Res., 105(D7),**  
723 **9003-9023, <https://doi.org/10.1029/1999JD901133>, 2000.**

724 **Haines, P. E., and Esler, J. G.: Determination of the source regions for surface to**  
725 **stratosphere transport: An Eulerian backtracking approach, Geophys. Res.**  
726 **Lett., 41, 1343-1349, doi:10.1002/2013GL058757, 2014.**

727 **Highwood, E. J., and Hoskins, B. J.: The tropical tropopause, Q. J. R. Meteorol.**  
728 **Soc., 124(549), 1579-1604, DOI: 10.1002/qj.49712454911, 1998.**

729 **Hosking, J. S., Russo, M. R., Braesicke, P., and Pyle, J. A.: Tropical convective**  
730 **transport and the Walker circulation, Atmos. Chem. Phys., 12, 9791-9797,**  
731 **doi:10.5194/acp-12-9791-2012, 2012**

732 Hu, D., Guan, Z., Tian, W., and Ren, R.: Recent strengthening of the  
733 stratospheric Arctic vortex response to warming in the central North Pacific,  
734 9, 1697, <https://doi.org/10.1038/s41467-018-04138-3>, 2018.

735 Hu, D., Guo, Y., Wang, F., Xu, Q., Li, Y., Sang, W., Wang, X., and Liu, M.:  
736 Brewer-Dobson circulation: Recent-Past and near-future trends simulated  
737 by chemistry-climate models, *Adv. Meteorol.*, 2017, 1-13,  
738 <https://doi.org/10.1155/2017/2913895>, 2017.

739 Hu, D., Guo, Y., Wang, F., Xu, Q., Li, Y., Sang, W., Wang, X., and Liu, M.:  
740 Brewer-Dobson circulation: Recent-Past and near-future trends simulated  
741 by chemistry-climate models, *Adv. Meteorol.*, 2017, 1-13,  
742 <https://doi.org/10.1155/2017/2913895>, 2017.

743 Hu, D., Tian, W., Guan, Z., Guo, Y., and Dhomse, S.: Longitudinal asymmetric  
744 trends of tropical cold-point tropopause temperature and their link to  
745 strengthened Walker circulation, *J. Climate*, 29(21), 7755–7771,  
746 <https://doi.org/10.1175/JCLI-D-15-0851.1>, 2016.

747 Huang, L., Jiang, J. H., Murray, L. T., Damon, M. R., Su, H., and Livesey, N.:  
748 Evaluation of UTLS carbon monoxide simulations in GMI and  
749 GEOS-Chem chemical transport models using Aura MLS observations,  
750 *Atmos. Chem. Phys.*, 16, 5641-5663, doi:10.5194/acp-16-5641-2016, 2016.

751 Krüger, K., Tegtmeier, S., and Rex, M.: Long-term climatology of air mass  
752 transport through the Tropical Tropopause Layer (TTL) during NH winter,  
753 *Atmos. Chem. Phys.*, 8, 813–823, doi:10.5194/acpd-7-13989-2007, 2008.

754 Levine, J. G., Braesicke, P., Harris, N. R. P., Pyle, J. A.: Seasonal and  
755 inter-annual variations in troposphere-to-stratosphere transport from the  
756 tropical tropopause layer, *Atmos. Chem. Phys.*, 8, 3689-3703,  
757 DOI:10.5194/acpd-8-489-2008, 2008.

758 Levine, J. G., Braesicke, P., Harris, N. R. P., Savage, N. H., and Pyle, J. A.:  
759 Pathways and timescales for troposphere-to-stratosphere transport via the  
760 tropical tropopause layer and their relevance for very short lived substances,  
761 *J. Geophys. Res.*, 112, D04308, doi:10.1029/2005JD006940, 2007.

762 **Livesey, N. J., Logan, J. A., Santee, M. L., Waters, J. W., Doherty, R. M., Read,**  
763 **W. G., Froidevaux, L., and Jiang, J. H.: Interrelated variations of O<sub>3</sub>, CO**  
764 **and deep convection in the tropical/subtropical upper troposphere observed**  
765 **by the Aura Microwave Lim Sounder (MLS) during 2004-2011, *Atmos.***  
766 ***Chem. Phys.*, 13, 579-598, doi:10.5194/acp-13-579-2013, 2013.**

767 **Livesey, N. J., Read, W. G., Wagner, P. A., Froidevaux, L., Lambert, A., Manney,**  
768 **G. L., Millán, L., Pumphrey, H. C., Santee, M. L., Schwartz, M. J., Wang, S.,**  
769 **Fuller, R. A., Jarnot, R. F., Knosp, B. W., and Martinez, E.: EOS MLS**  
770 **Version 4.2x Level 2 data quality and description document, Jet Propulsion**  
771 **Laboratory, California Institute of Technology, Pasadena, CA, 2015.**

772 **Lu, J., Xie, F., Sun, C., Luo, J., Cai, Q., Zhang, J., Li, J., and Tian, H.: Analysis**  
773 **of factors influencing tropical lower stratospheric water vapor during**  
774 **1980–2017, *npj Clim. Atmos. Sci.*, 3(1), 35,**  
775 **<https://doi.org/10.1038/s41612-020-00138-7>, 2020.**

776 **Navarro, M. A., Atlas, E. L., Saiz-Lopez, A., Rodriguez-Lloveras, X., Kinnison, D.**  
777 **E., Lamarque, J., Tilmes, S., Filus, M., and Harris, N. R. P., et al.: Airborne**  
778 **measurements of organic bromine compounds in the Pacific tropical**  
779 **tropopause layer, *P. Natl. Acad. Sci. USA*, 112, 13789-13793,**  
780 **doi:10.1073/pnas.1511463112, 2015.**

781 **Pan, L. L., Atlas, E. L., Salawitch, R. J., Honomichl, S. B., Bresch, J. F., and**  
782 **Randel, W. J., et al.: The Convective Transport of Active Species in the**  
783 **Tropics (CONTRAST) Experiment, *B. Am. Meteorol. Soc.*, 98(1), 106-128,**  
784 **DOI: 10.1175/BAMS-D-14-00272.1, 2016.**

785 **Pan, L. L., Honomichl, S. B., Thornberry, T., Rollins, A., Bui, T. P., Pfister, L.,**  
786 **and Jensen E. E.: Observational Evidence of Horizontal Transport-Driven**  
787 **Dehydration in the TTL, *Geophys. Res. Lett.*, 46(13), 7848-7856,**  
788 **DOI: 10.1029/2019GL083647, 2019.**

789 **Qie, K., Qie, X., and Tian, W.: Increasing trend of lightning activity in the South**  
790 **Asia region, *Sci. Bull.*, 66, 78-84, <https://doi.org/10.1016/j.scib.2020.08.033>,**  
791 **2021.**

792 Rao, J., Yu, Y., Guo, D., Shi, C., Chen, D., and Hu, D.: Evaluating the  
793 Brewer-Dobson circulation and its responses to ENSO, QBO, and the solar  
794 cycle in different reanalyses, *Earth Planet. Phys.*, 3(2), 1-16,  
795 <http://doi.org/10.26464/epp2019012>, 2019.

796 Rex, M., Wohltmann, I., Ridder, T., Lehmann, R., Rosenlof, K., Wennberg, P.,  
797 Weisenstein, D., Notholt, J., Krüger, K., Mohr, V., and Tegtmeier, S.: A  
798 tropical West Pacific OH minimum and implications for stratospheric  
799 composition, *Atmos. Chem. Phys.*, 14, 4827-4841,  
800 [doi:10.5194/acp-14-4827-2014](https://doi.org/10.5194/acp-14-4827-2014), 2014.

801 Rosenlof, K. H. How water enters the stratosphere, *Science*, 302, 1691-1692,  
802 [doi:10.1126/science.1092703](https://doi.org/10.1126/science.1092703), 2003.

803 Ryu, J., and Lee, S.: Effect of tropical waves on the tropical tropopause  
804 transition layer upwelling, *J. Atmos. Sci.*, 67(10), 3130-3148,  
805 DOI: 10.1175/2010JAS3434.1, 2010.

806 Sherwood, S. C.: A stratospheric “drain” over the maritime continent, *Geophys.*  
807 *Res. Lett.*, 27(5), 677-680, <https://doi.org/10.1029/1999GL010868>, 2000.

808 Shirley, D., Stanley, W., & Daniel, C.: *Statistics for Research (Third Edition)*, (p.  
809 627), Hoboken, New Jersey: John Wiley & Sons Inc., 2004.

810 Uma, K. N., Das, S. S., Ratnam, M. V., and Suneeth, K. V.: Assessment of vertical  
811 air motion among reanalyses and qualitative comparison with  
812 very-high-frequency radar measurements over two tropical stations, *Atmos.*  
813 *Chem. Phys.*, 21, 2083-2103, <https://doi.org/10.5194/acp-21-2083-2021>, 2021.

814 Wang, S., Schmidt, J. A., Baidar, S., Coburn, S., Dix, B., and Koenig, T. K., et al.:  
815 Active and wide-spread halogen chemistry in the tropical and subtropical  
816 free troposphere, *P. Natl. Acad. Sci. USA*, 112, 9281–9286,  
817 DOI: 10.1073/pnas.1505142112, 2015.

818

819

820
